# Supplementary material
Source: PubMed Central journal article supplement (PMC3820018)

# **Saliniquinones A-F, Anthraquinone- $\gamma$ -pyrones from *Salinispora arenicola***

Brian T. Murphy, Tadigoppula Narendar, Christopher A. Kauffman, Matthew Woolery, Paul R. Jensen, and William Fenical

*Center for Marine Biotechnology and Biomedicine, Scripps Institution of Oceanography, University of California – San Diego,  
La Jolla, California 92093-0204*

**Accessory Publication.**

Saliniquinone A (**1**).  $^1\text{H}$  NMR (600 MHz;  $\text{CDCl}_3$ ).

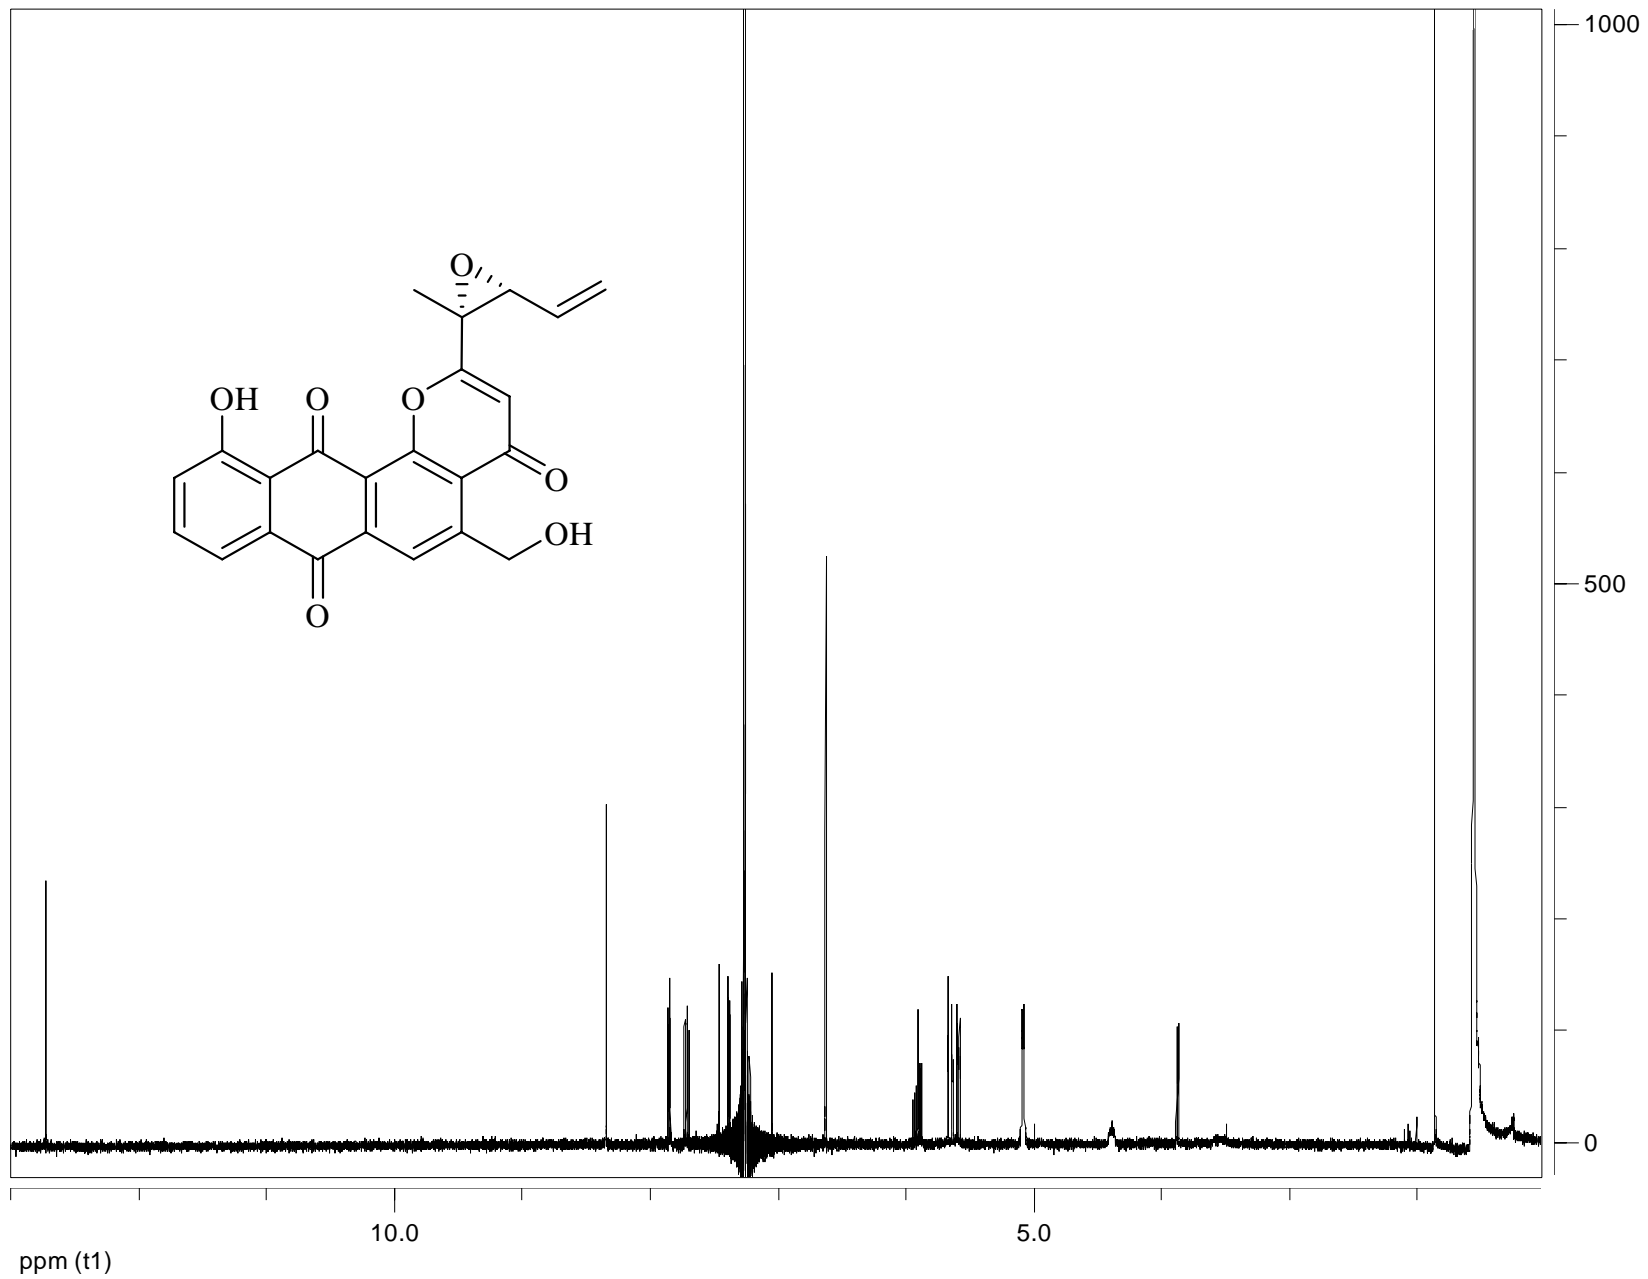

Saliniquinone A (1). HMBC Spectrum (600 MHz; CDCl<sub>3</sub>).

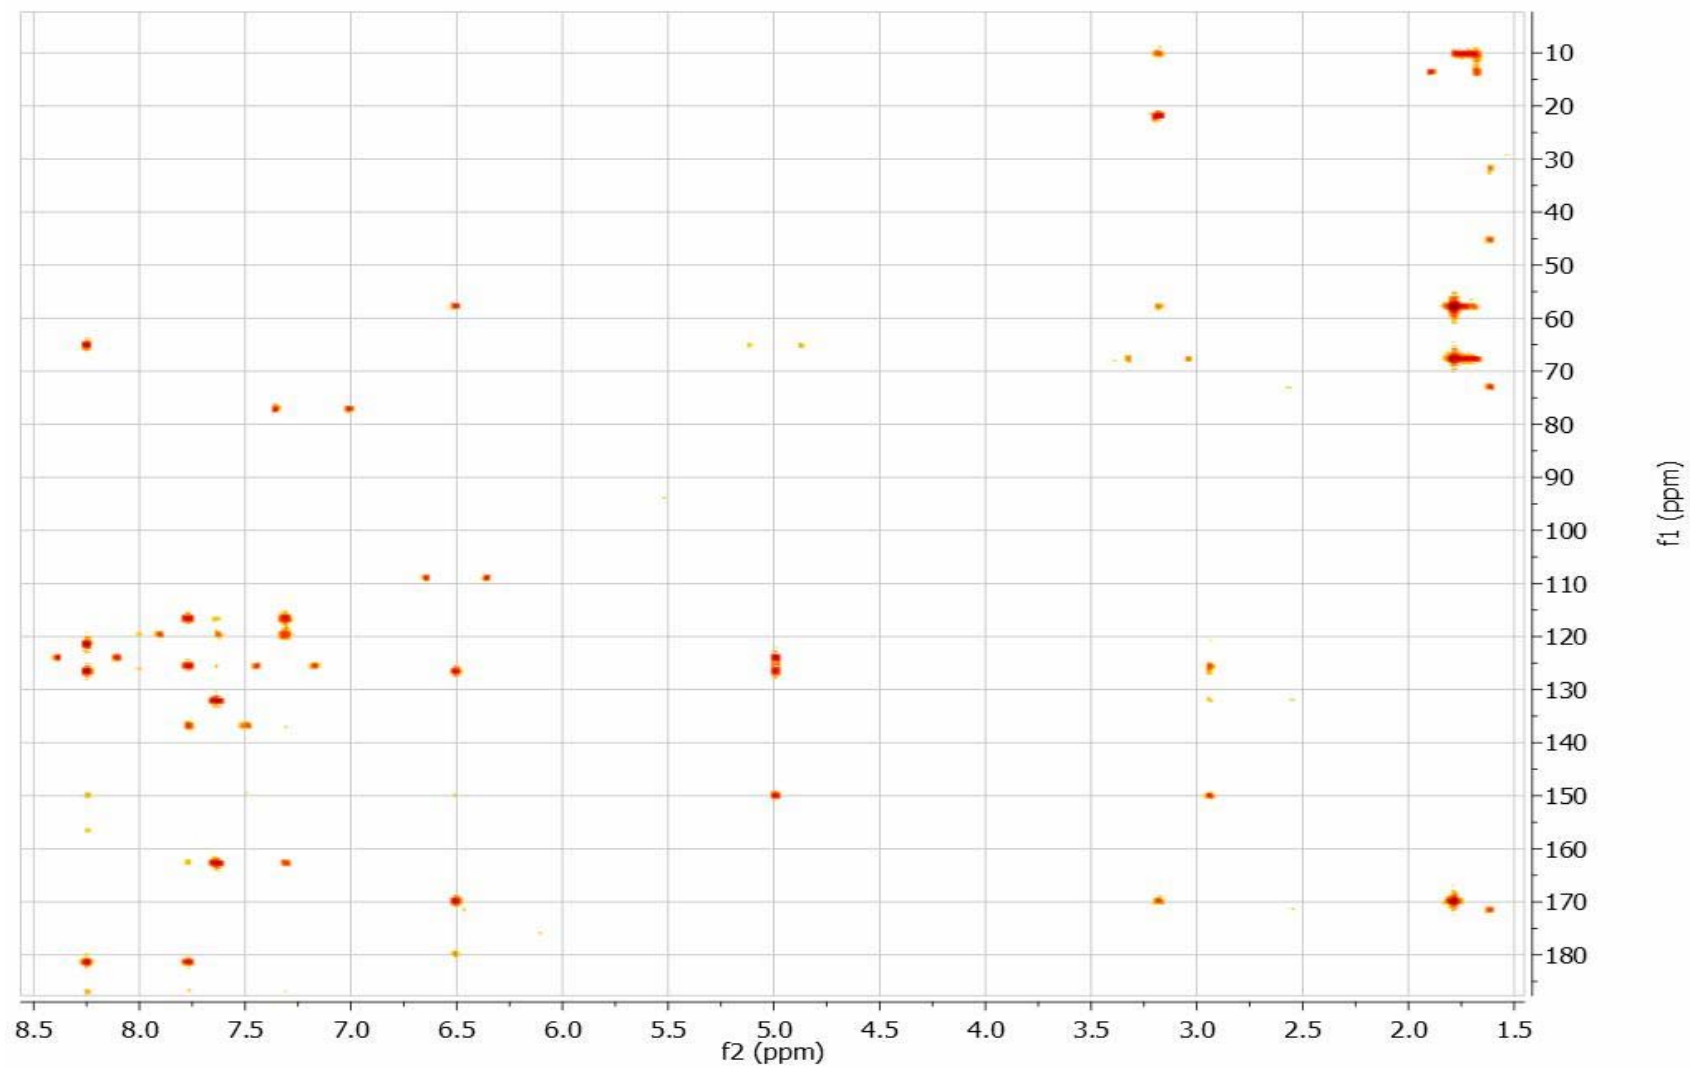

# Saliniquinone A (1). UV and Mass (ESI) Spectra.

\*DAD1, 15.851 (6.4 mAU, -) Ref=15.731 & 16.105 of S32

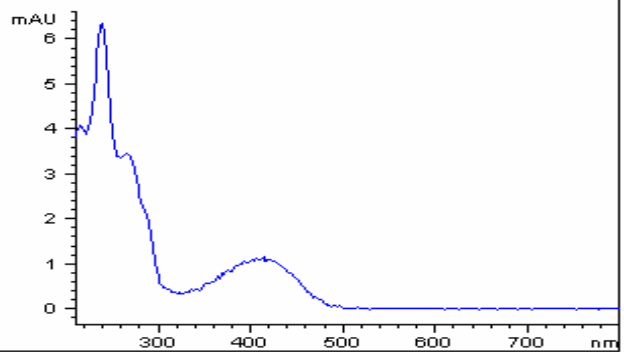

\*MSD1 SPC, time=15.882:16.001 of E:\BRIAN\S3253-22.D API-ES, Pos, Scan, Frag: 70

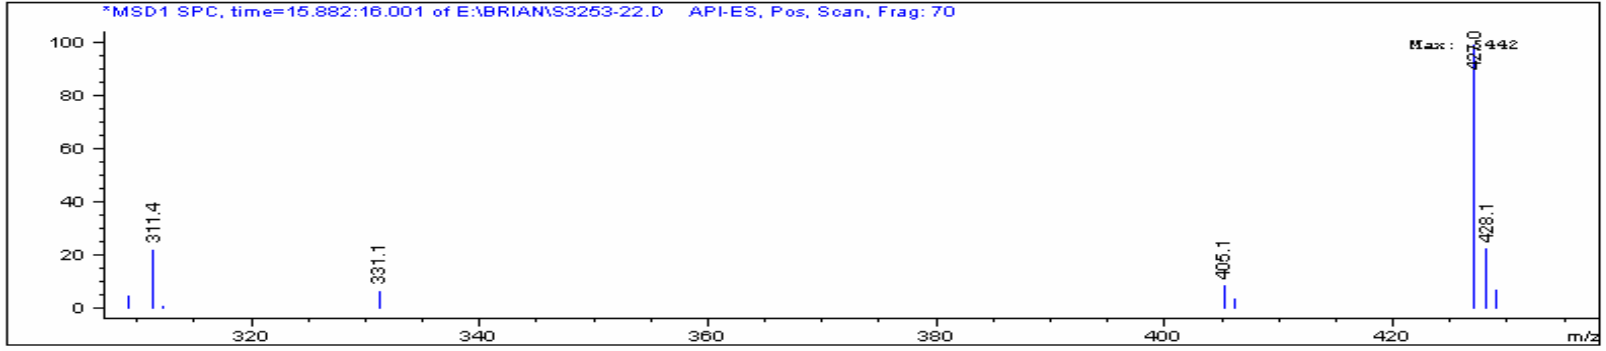

\*MSD1 SPC, time=15.882:16.001 of E:\BRIAN\S3253-22.D API-ES, Pos, Scan, Frag: 70

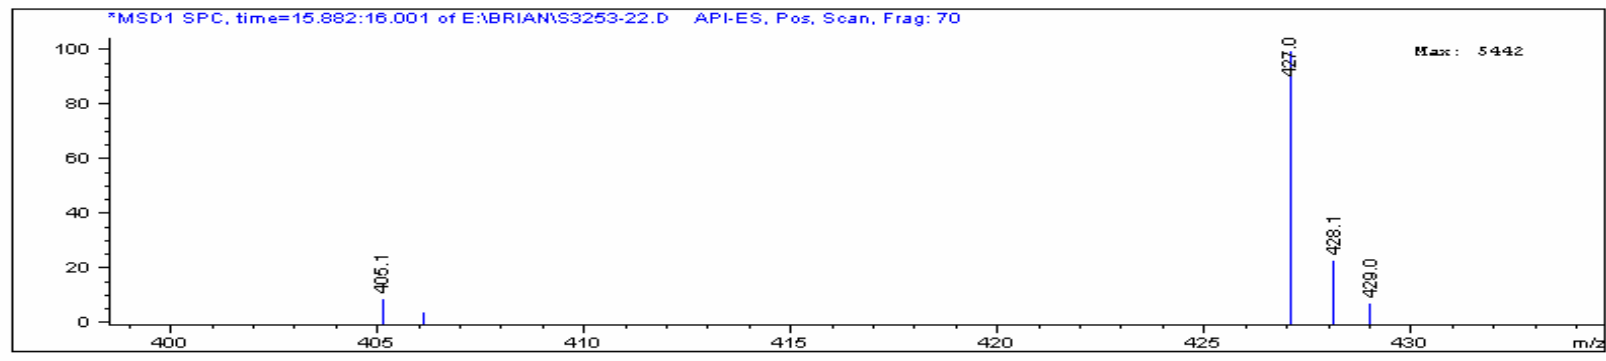

Saliniquinone B (2).  $^1\text{H}$  NMR (600 MHz;  $\text{CDCl}_3$ ).

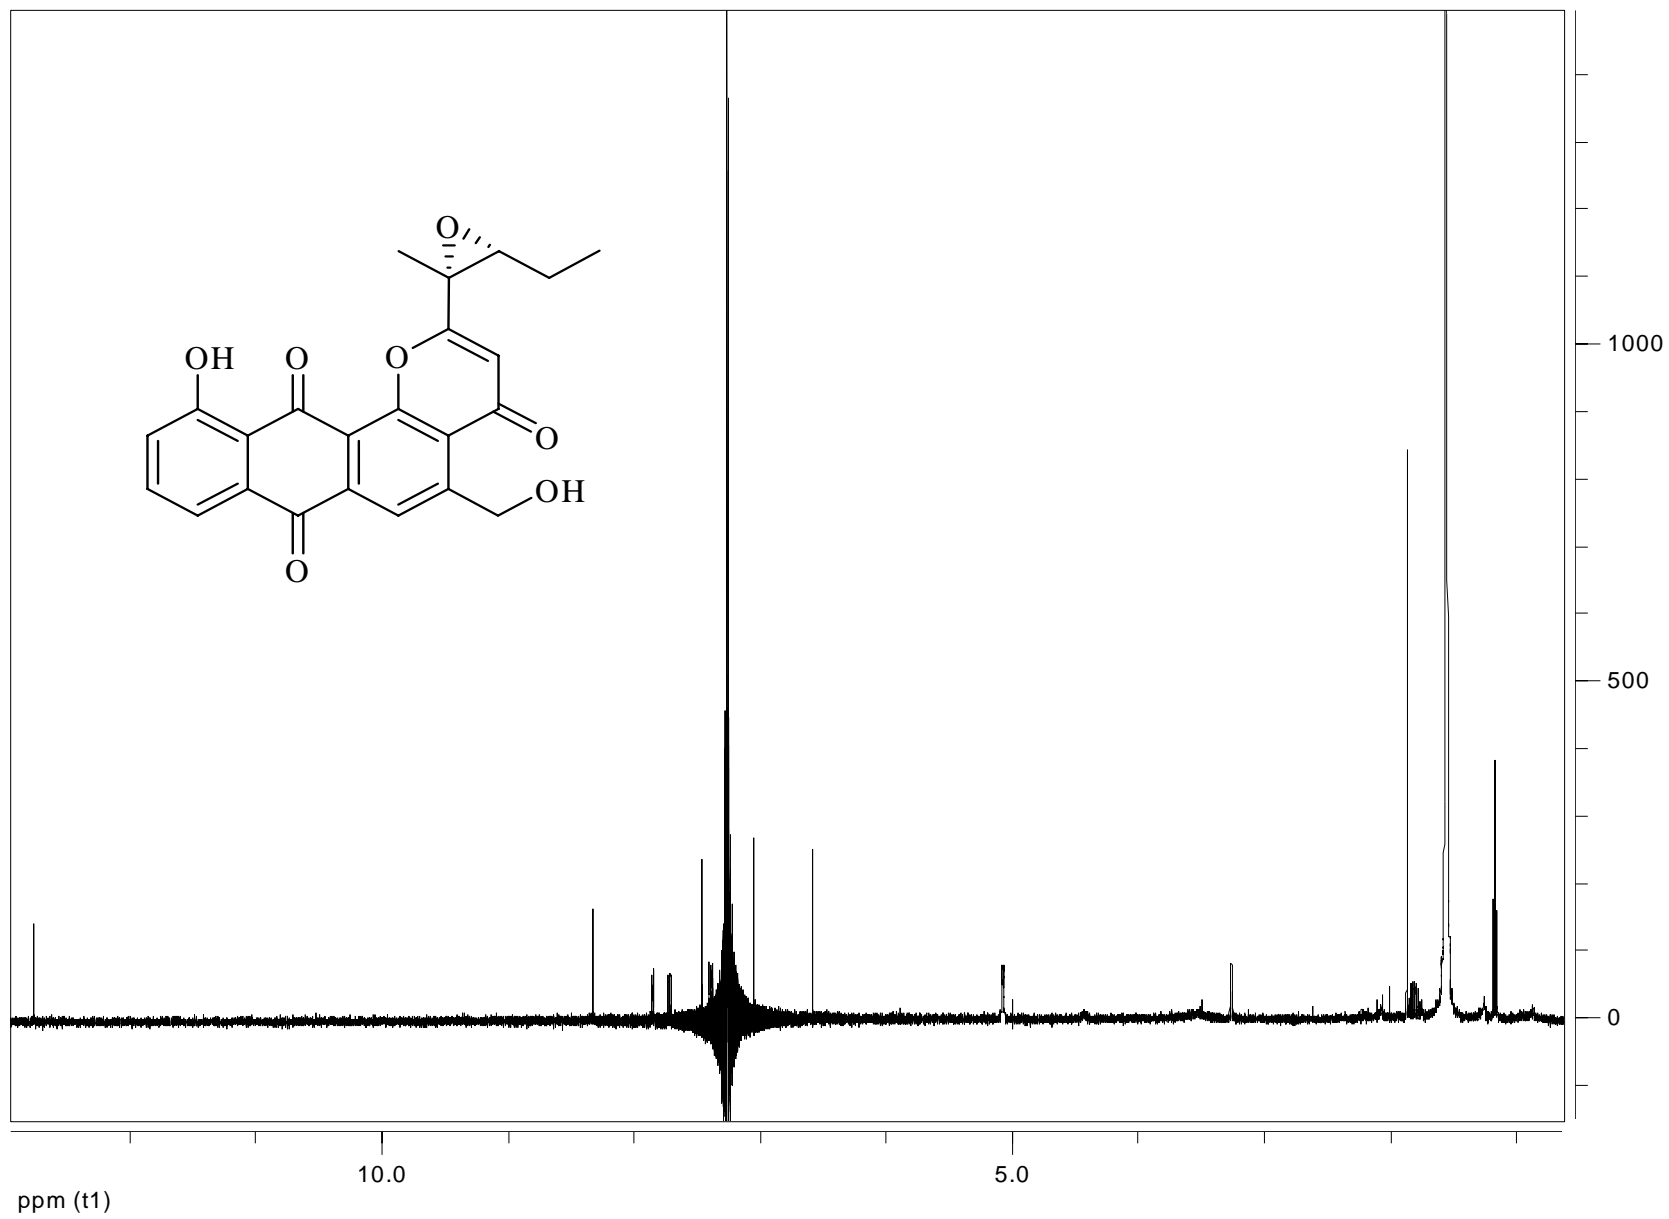

Saliniquinone B (2). HMBC Spectrum (600 MHz; CDCl<sub>3</sub>).

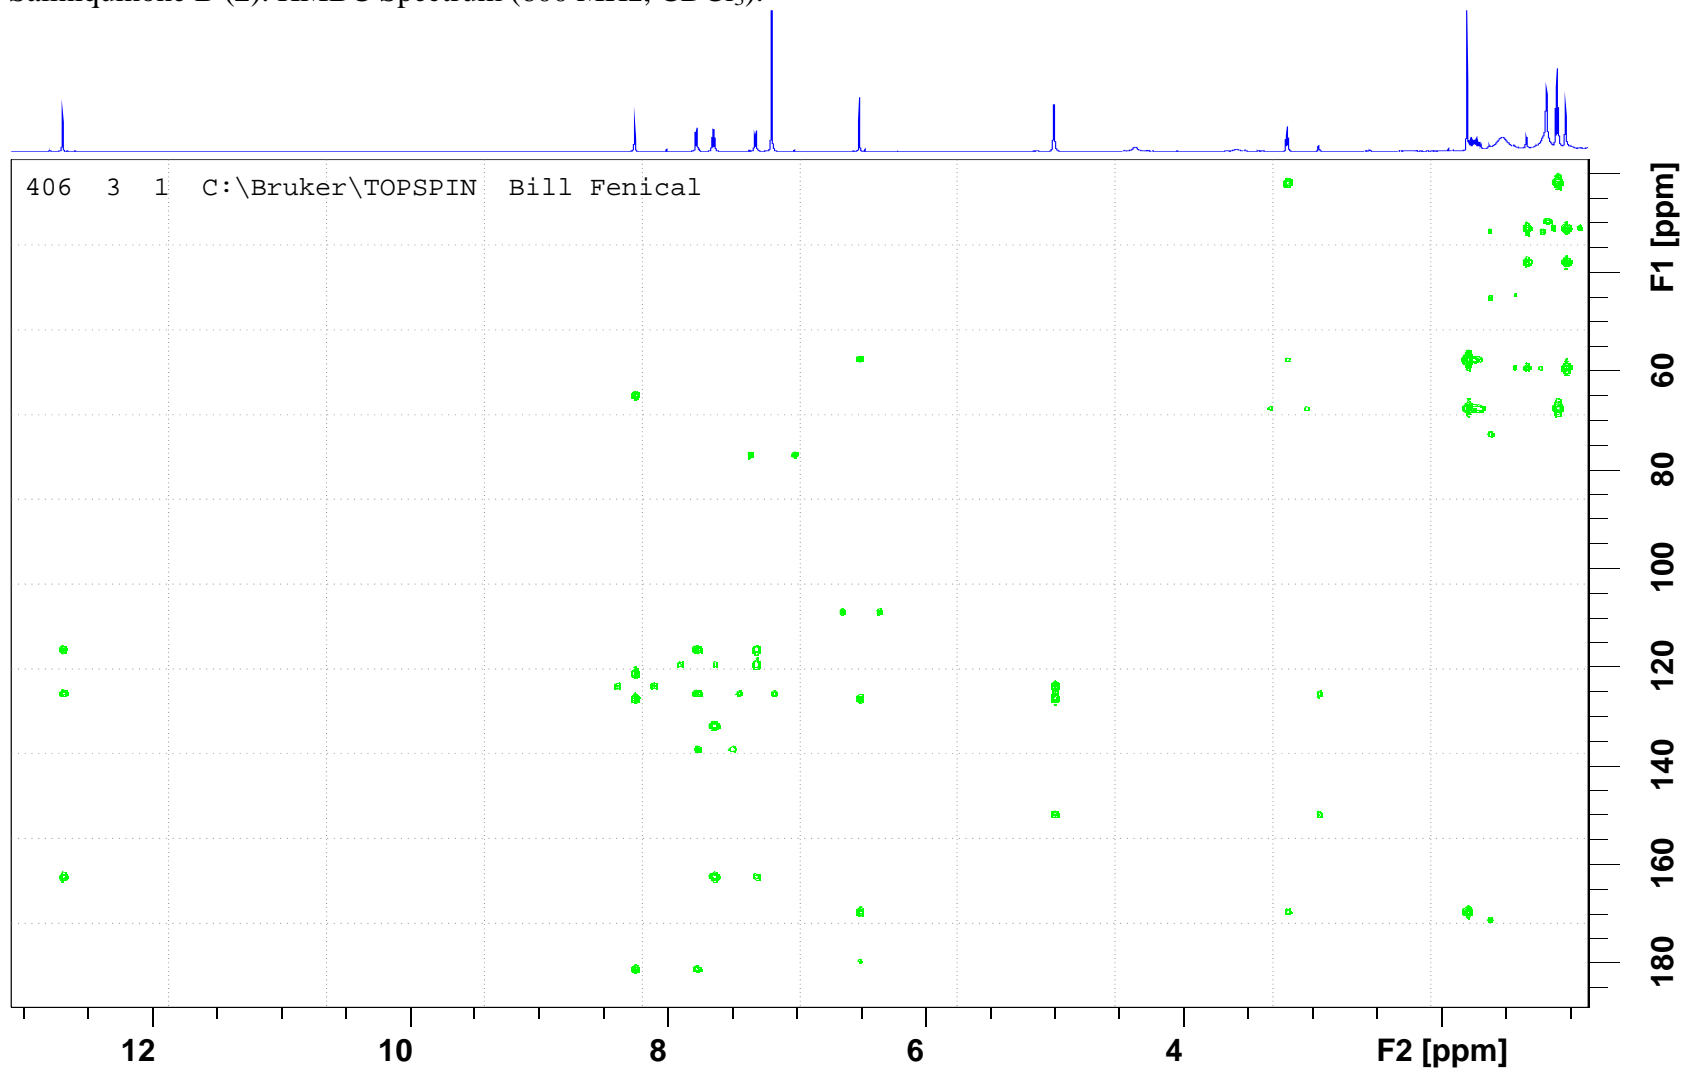

Saliniquinone C (3).  $^1\text{H}$  NMR (600 MHz;  $\text{CDCl}_3$ ).

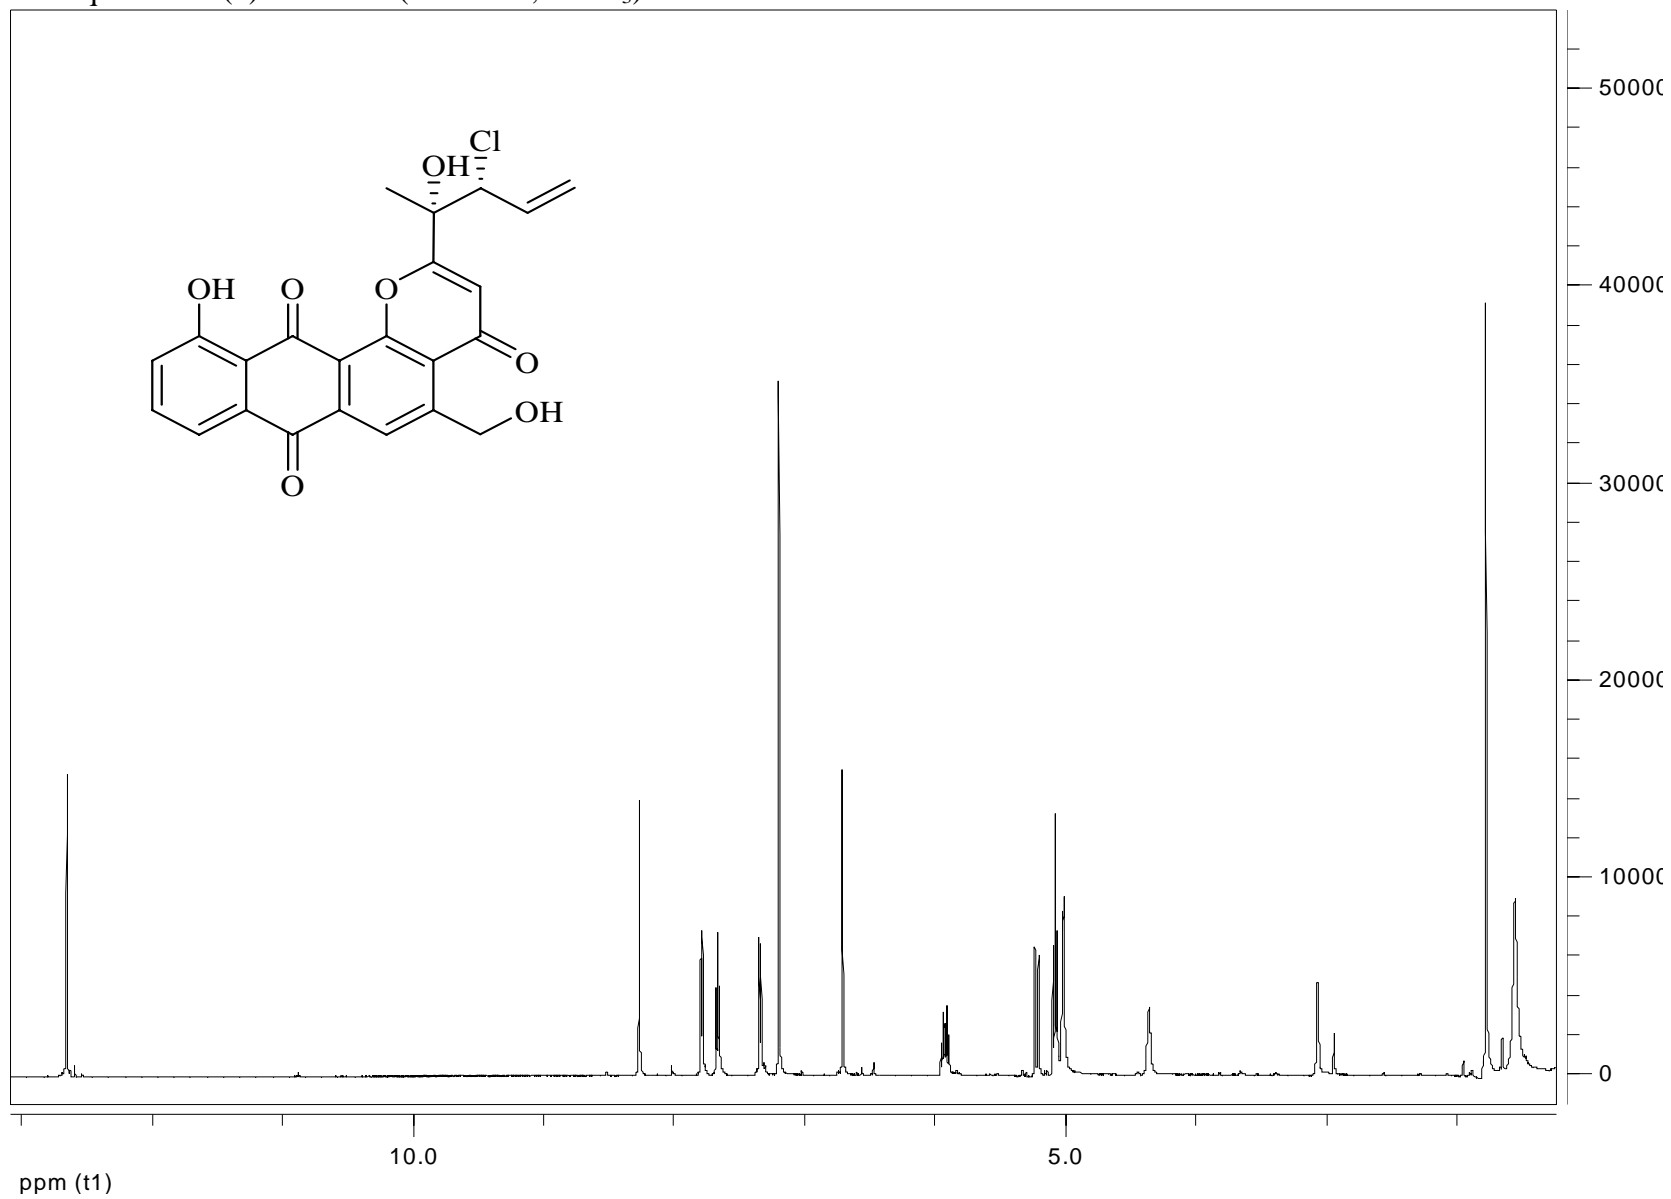

Saliniquinone C (3). HMBC Spectrum (600 MHz; CDCl<sub>3</sub>).

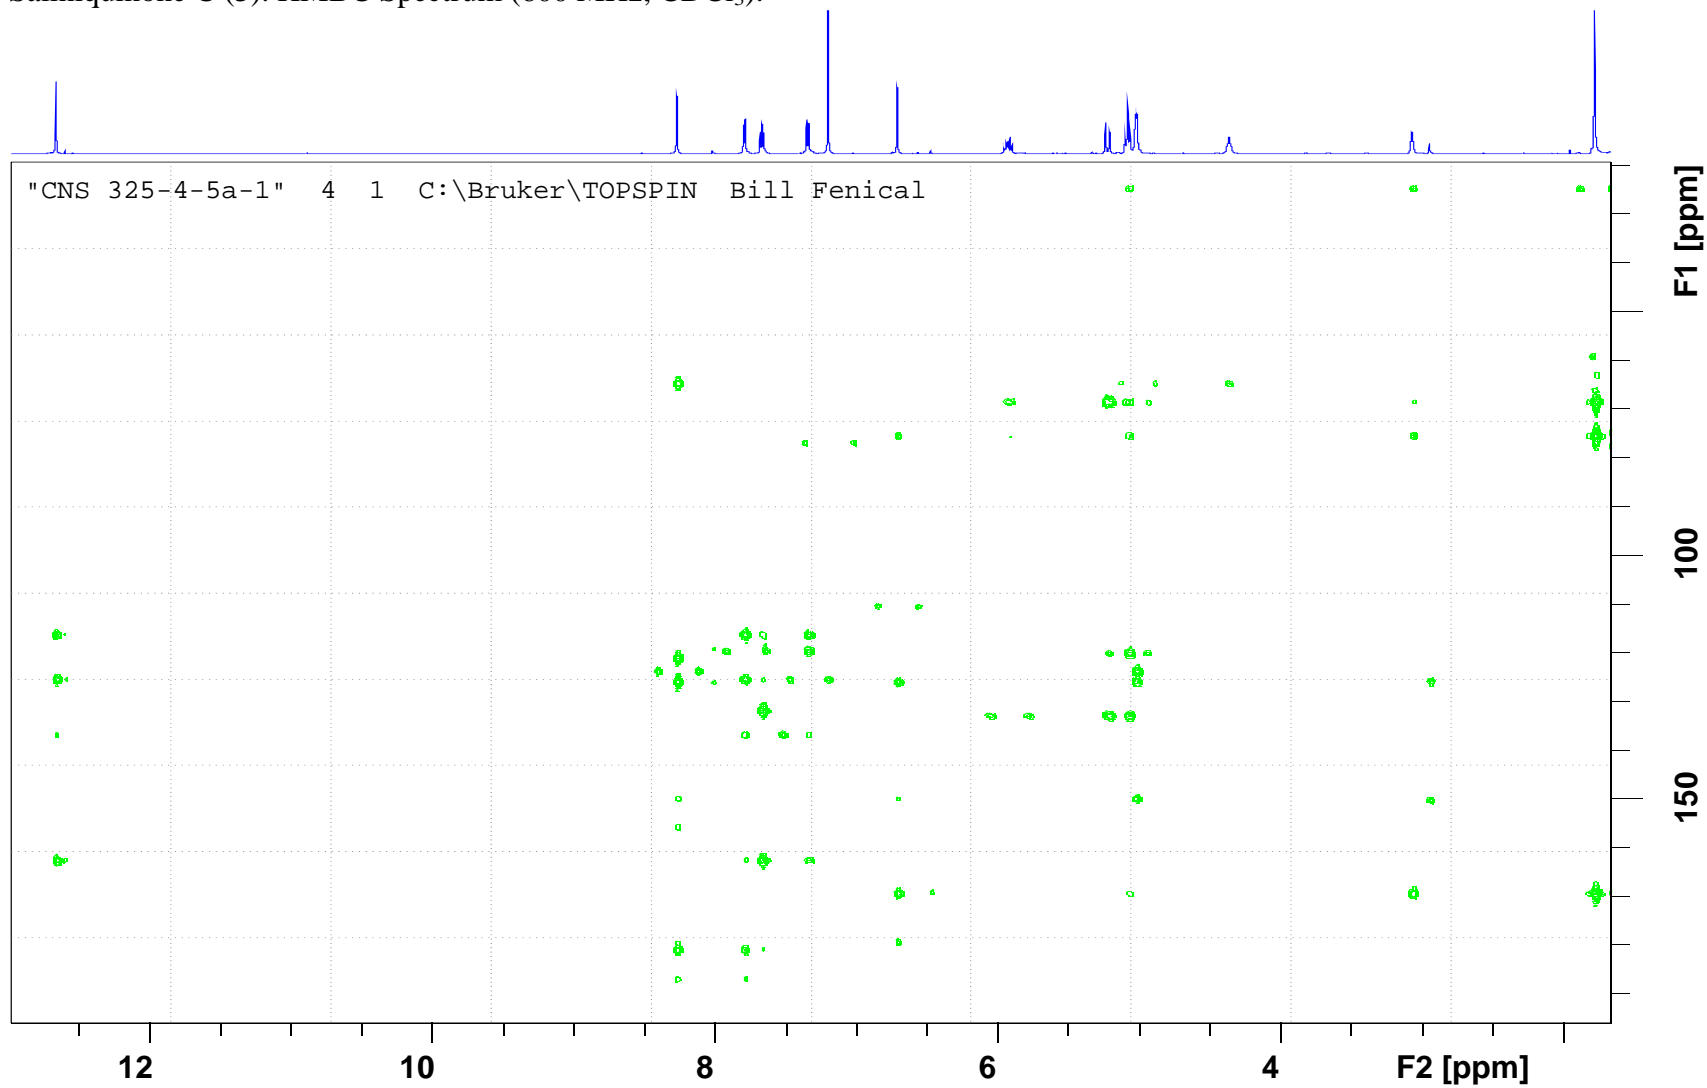



Saliniquinone D (4).  $^1\text{H}$  NMR (600 MHz;  $\text{CDCl}_3$ ).

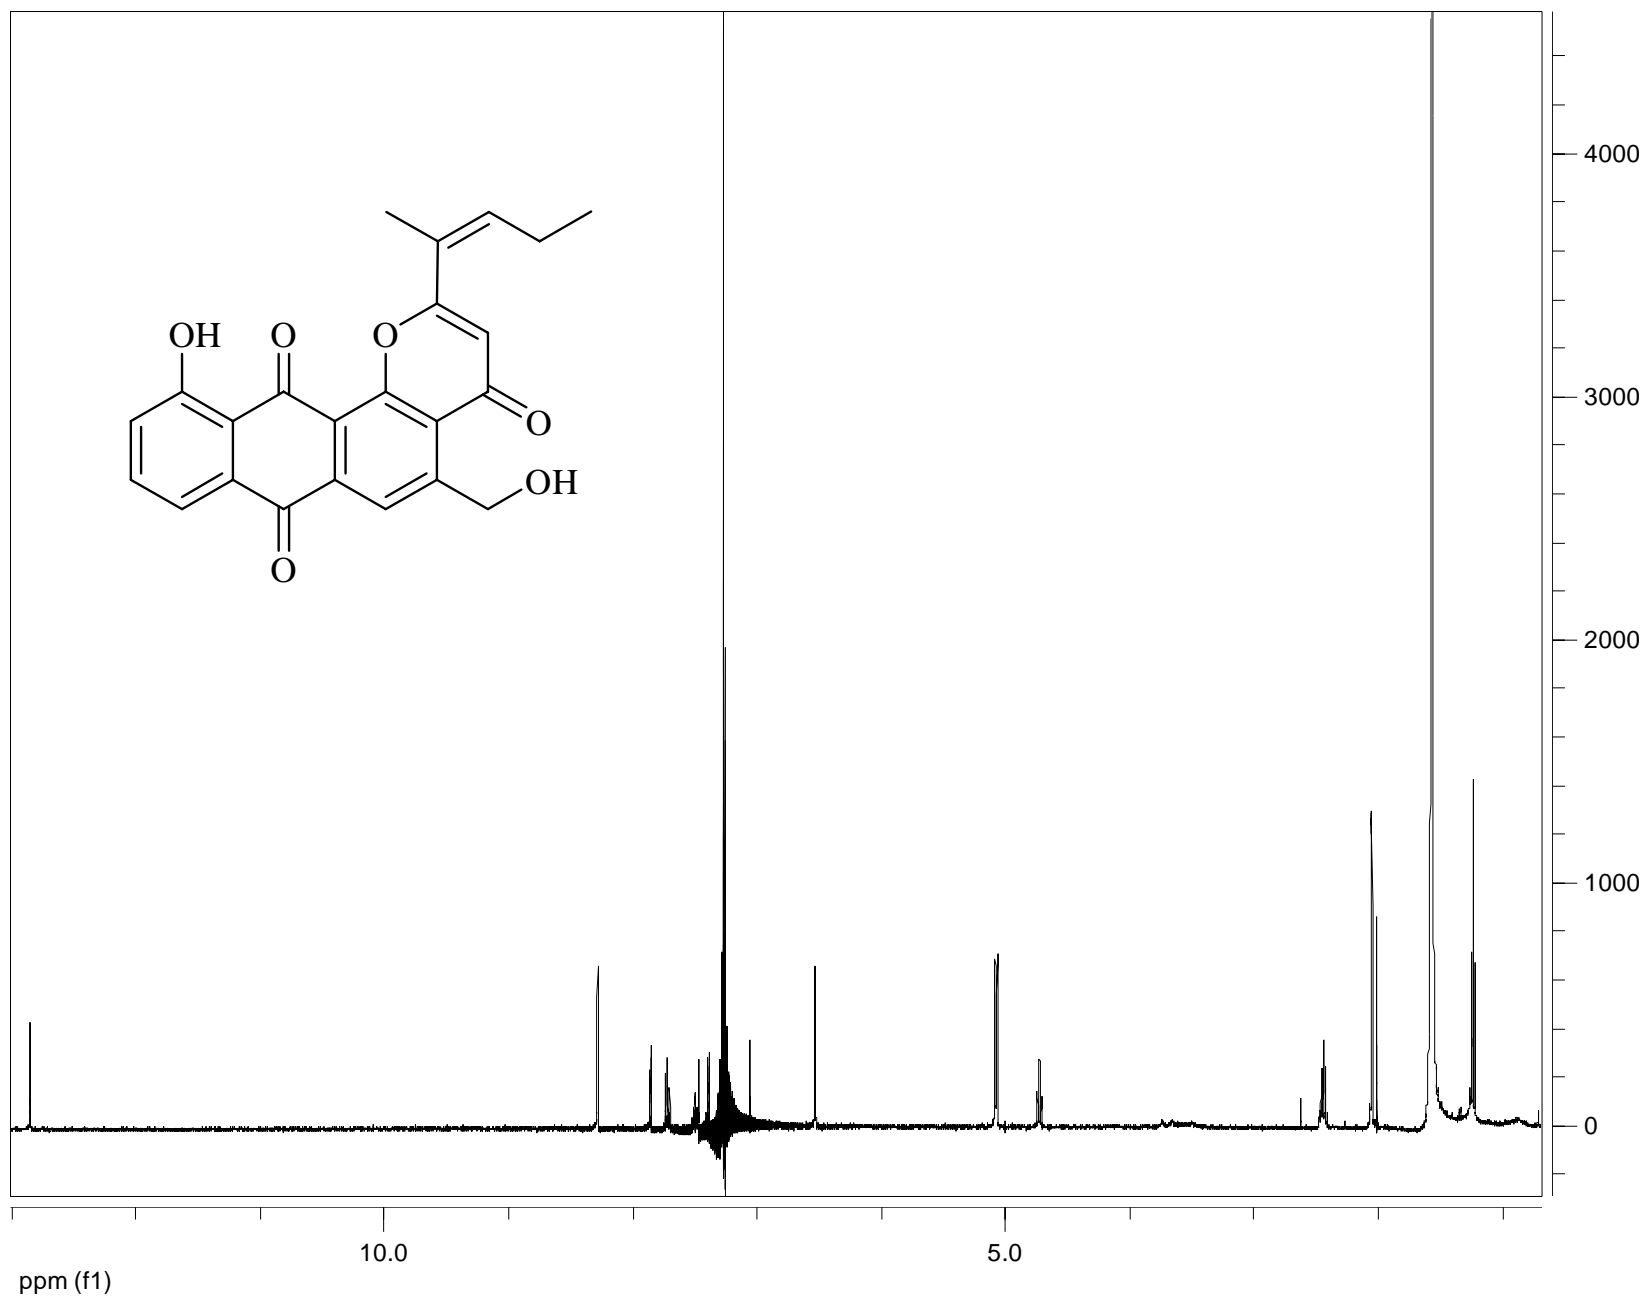

Saliniquinone D (4). HMBC Spectrum (600 MHz; CDCl<sub>3</sub>).

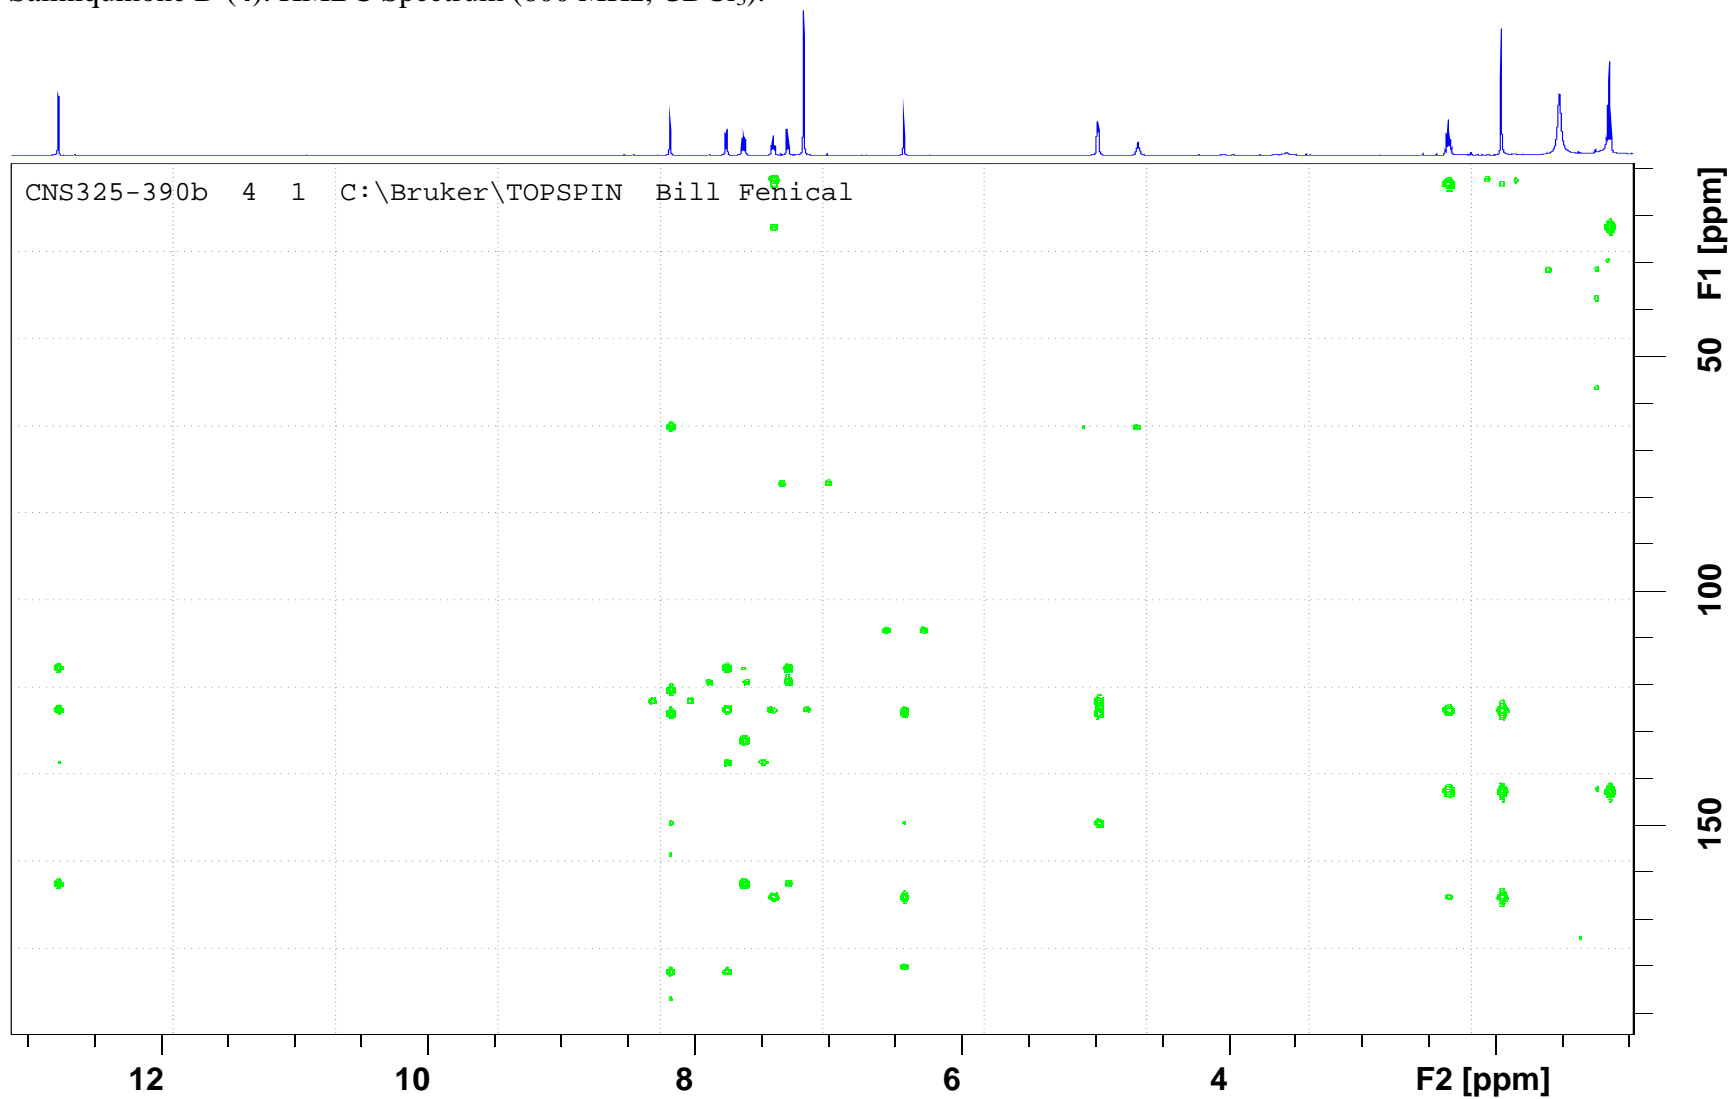

Saliniquinone E (**5**).  $^1\text{H}$  NMR (600 MHz;  $\text{CDCl}_3$ ).

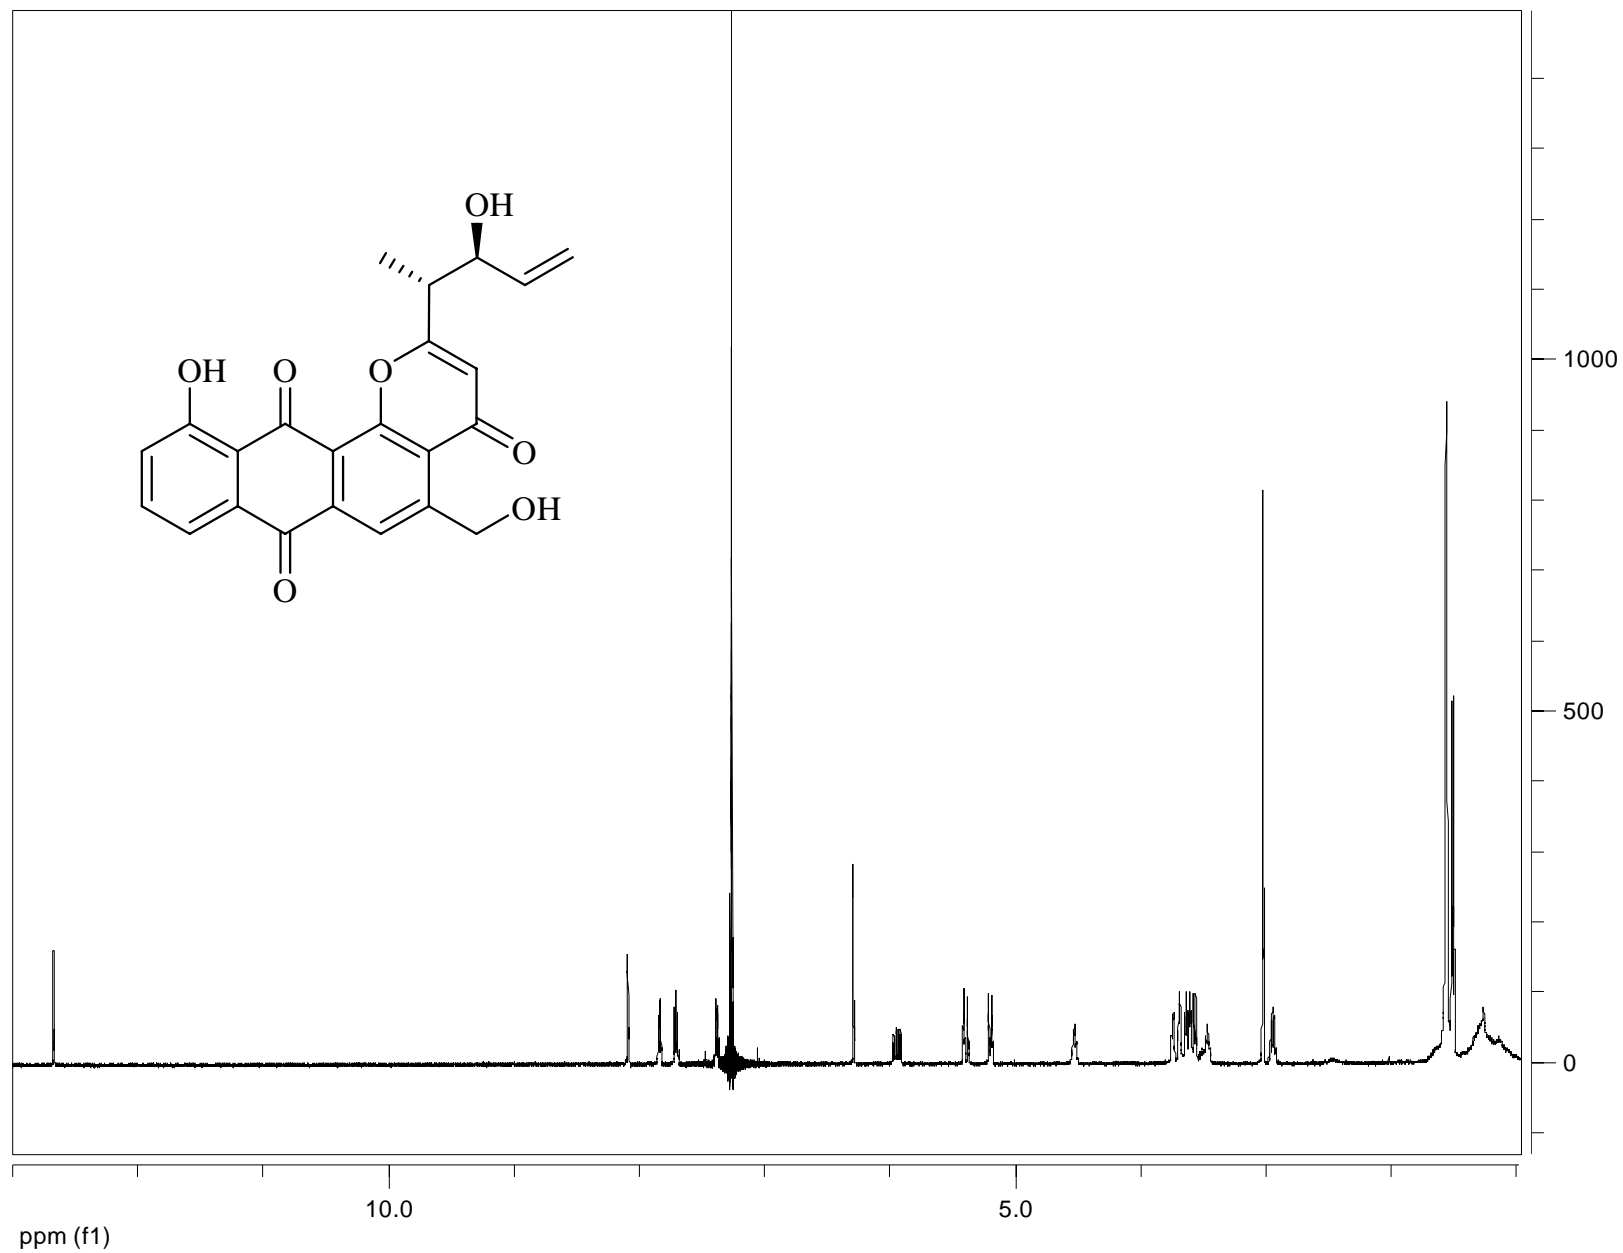

Saliniquinone E (5). HMBC Spectrum (600 MHz; CDCl<sub>3</sub>).

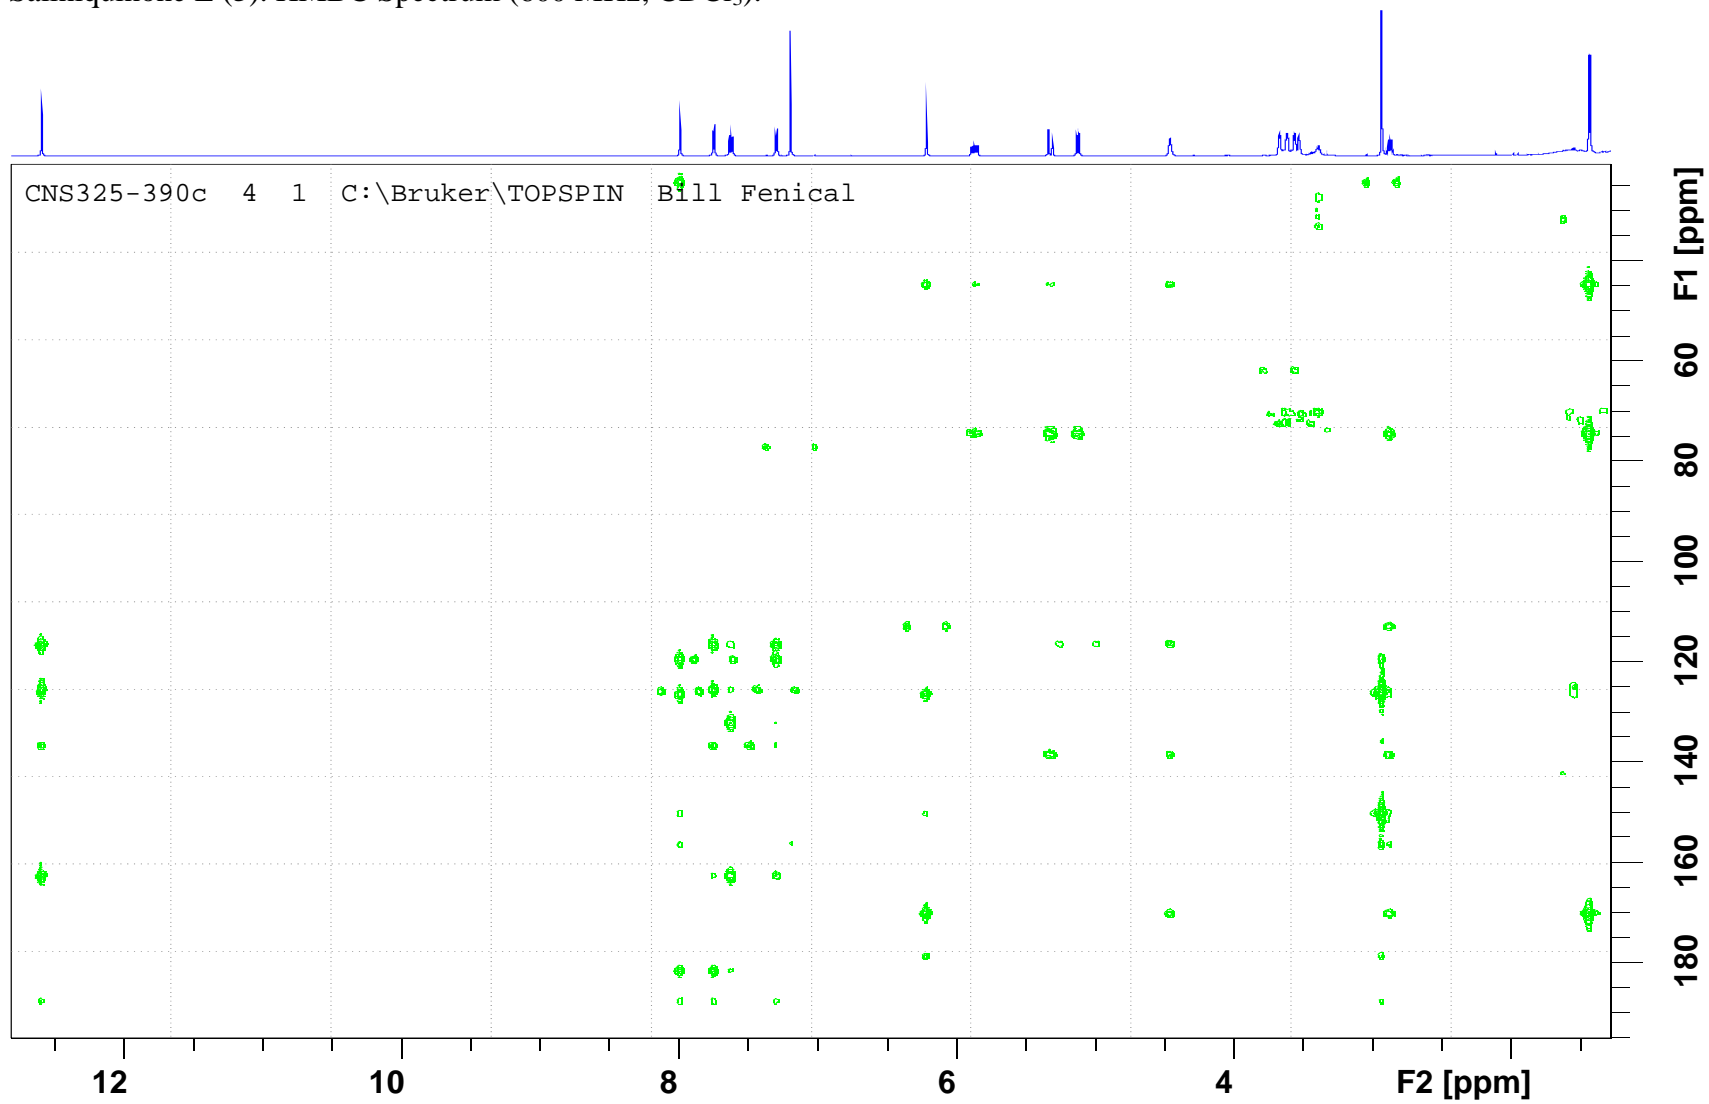

Saliniquinone F (**6**).  $^1\text{H}$  NMR (600 MHz;  $\text{CDCl}_3$ ).

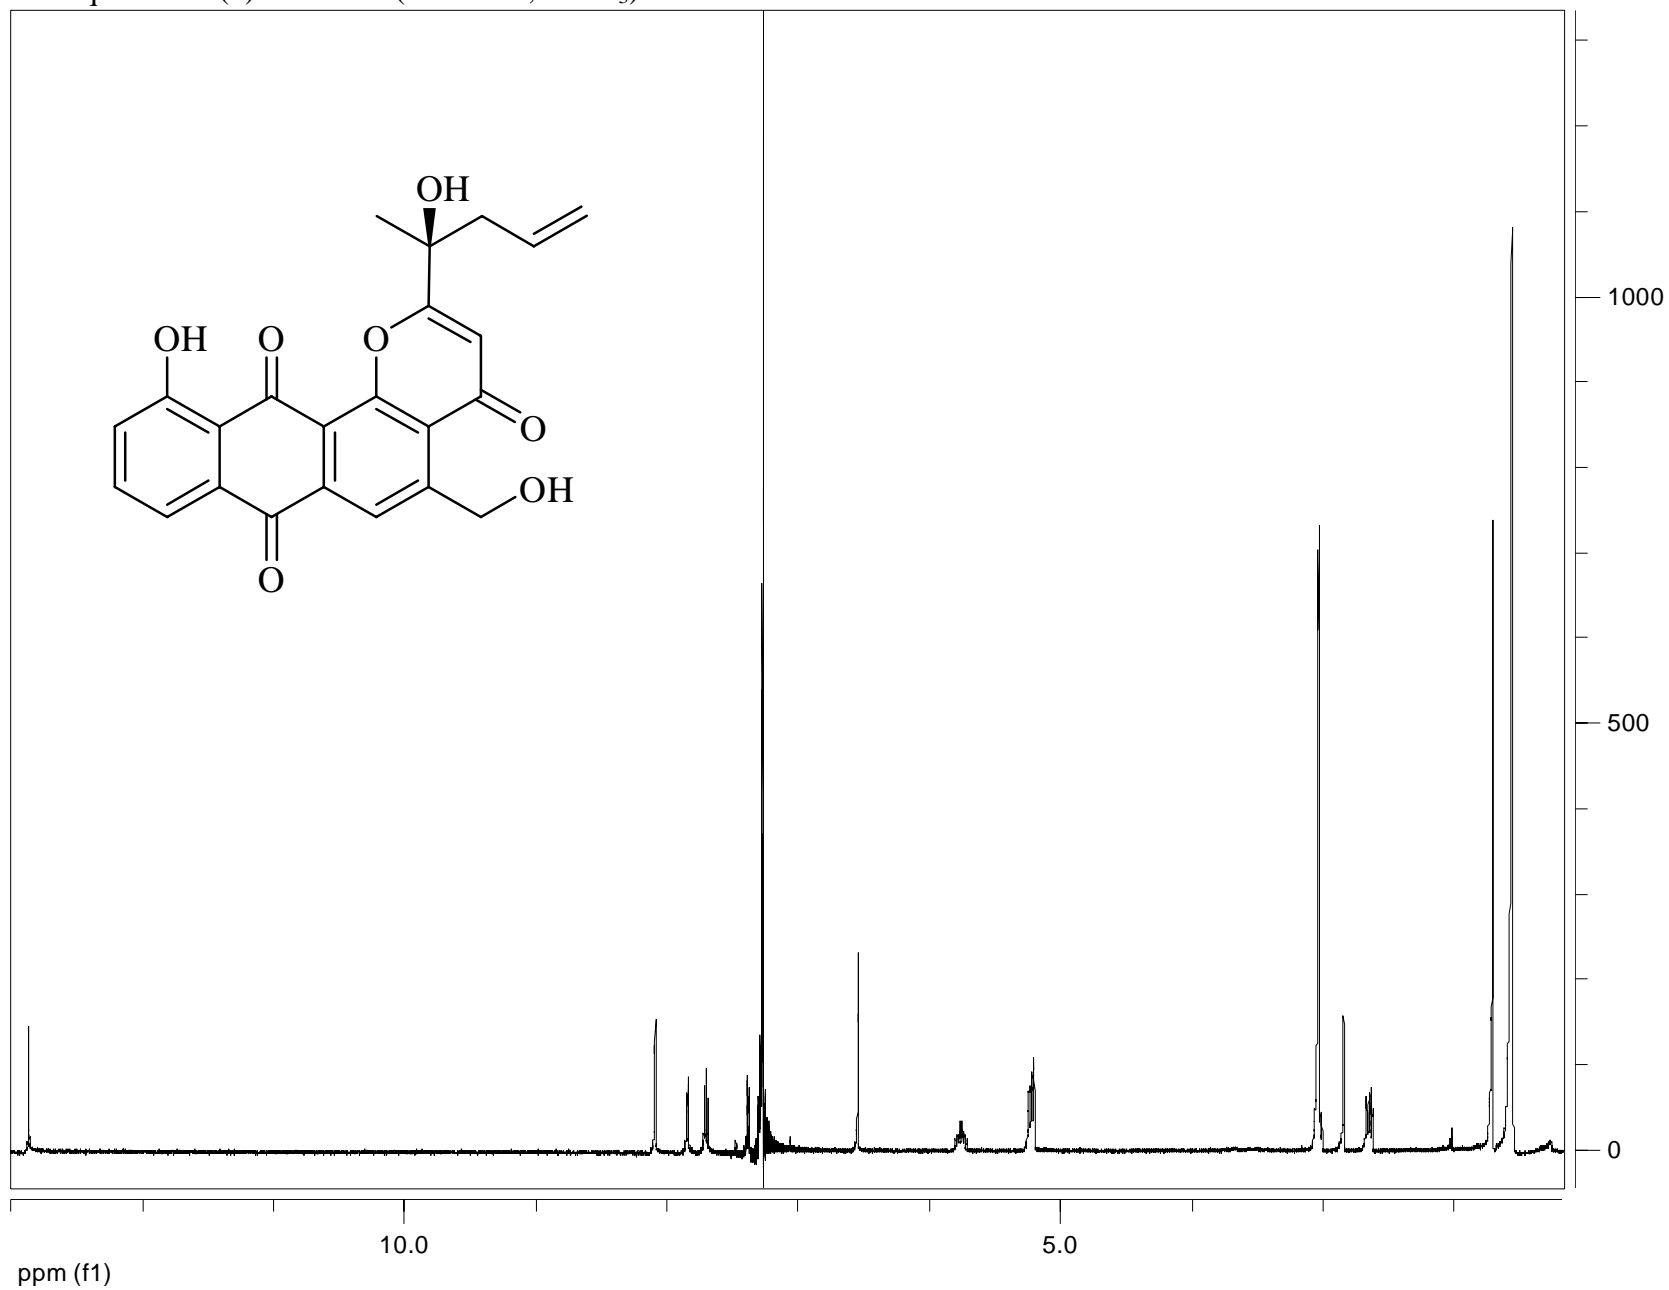

Saliniquinone F (6). HMBC Spectrum (600 MHz; CDCl<sub>3</sub>).

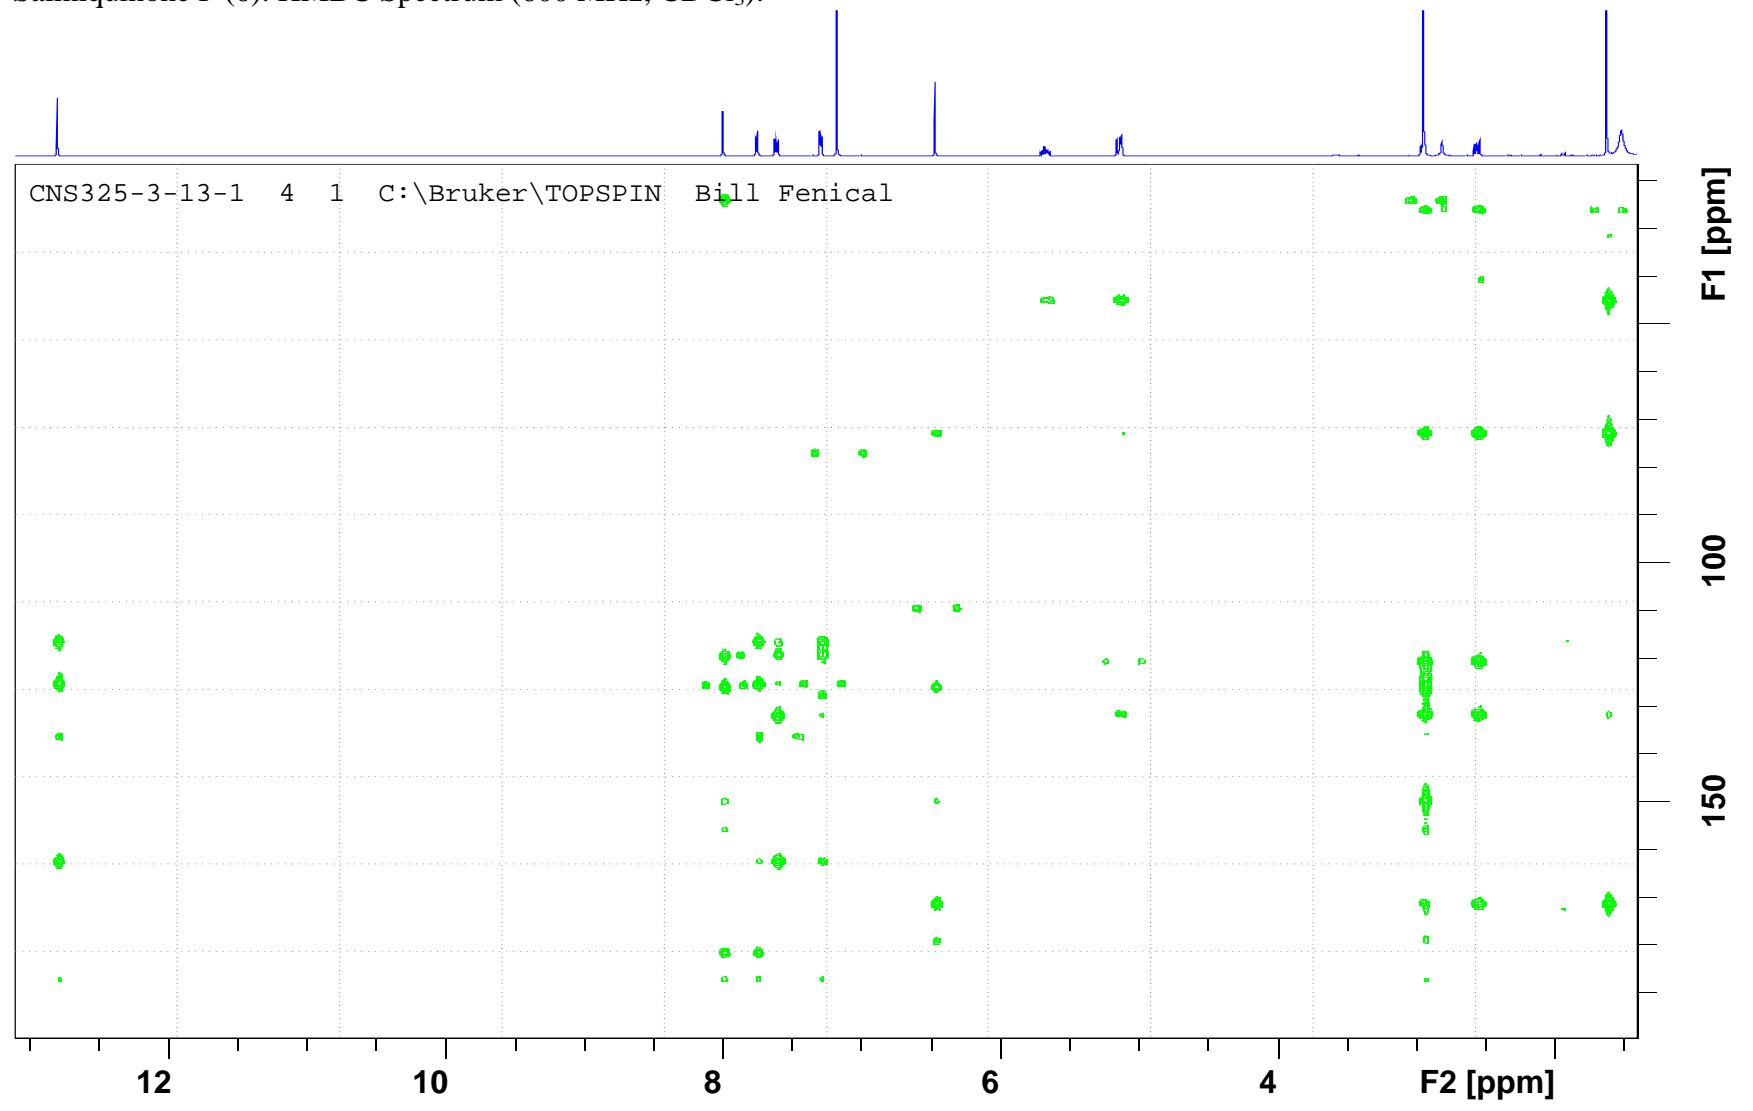

Supplement: NIHMS485054-supplement-Supporting_Info.pdf [file NIHMS485054-supplement-Supporting_Info.pdf]
